# Supplementary material
Source: publisher site journal article supplement (https://www.dovepress.com/article/377017)
Supplement: Supplementary file 1 [file get_supplementary_file.php]

Annex. 1

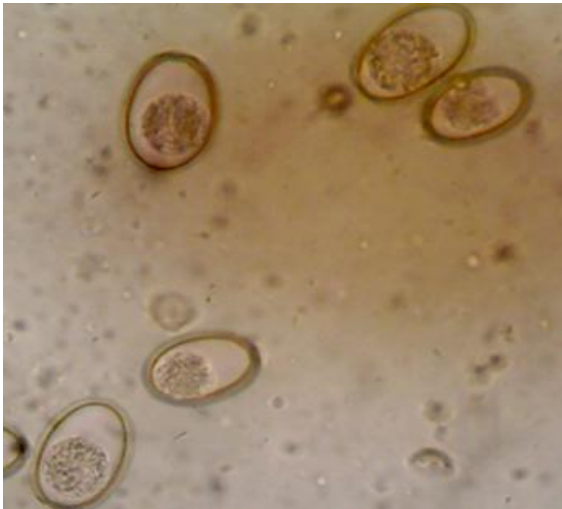

Un-sporulated *Eimeria* oocysts from sheep

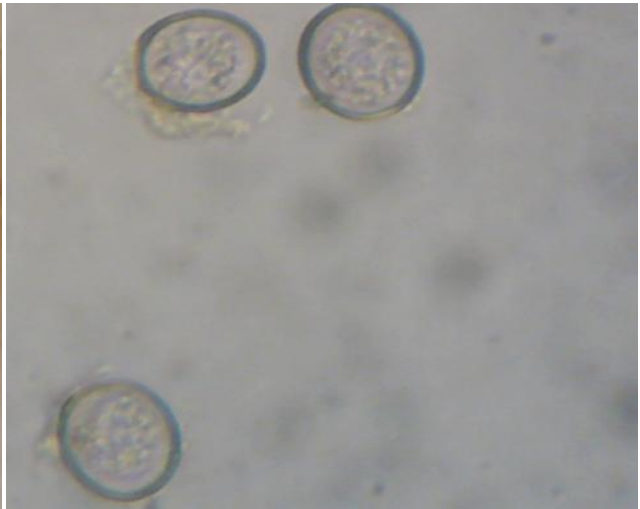

Un-sporulated *Eimeria* oocysts from cattle

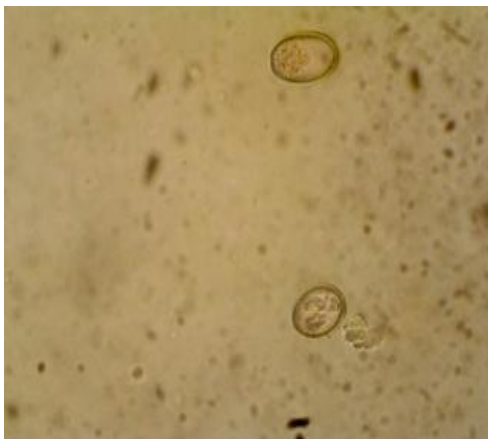

Sporulated *Eimeria* oocyst from sheep

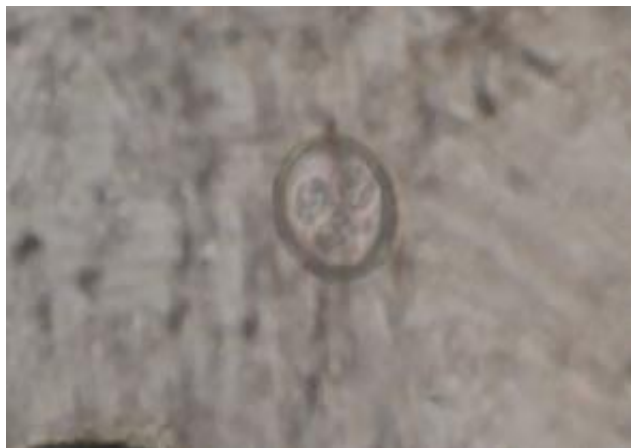

Sporulated *Eimeria* oocysts from cattle

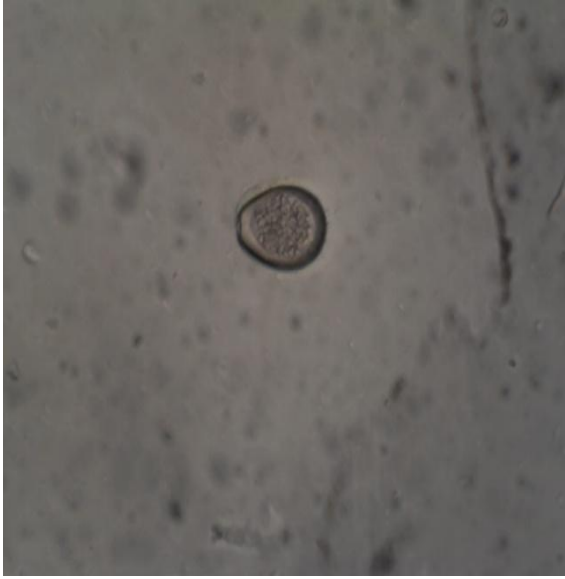

Unsporulated *Eimeria* oocysts from cattle

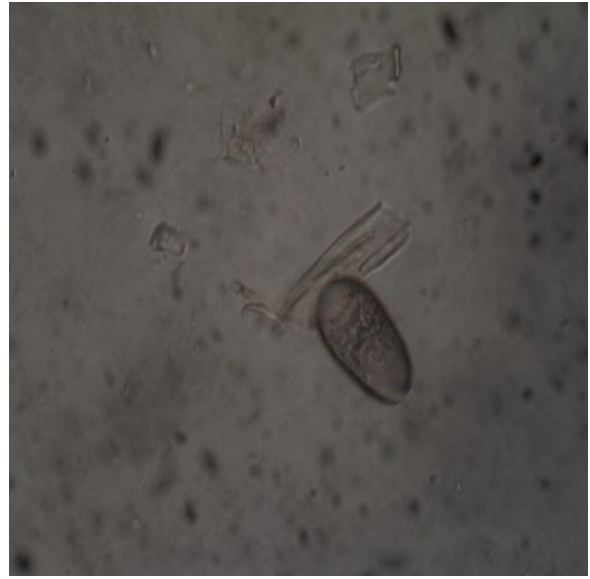

Unsporulated *Eimeria* oocysts from cattle
